# Supplementary material for: Regulation of host and viral promoters during human cytomegalovirus latency via US28 and CTCF
Source: PubMed Central journal article supplement (PMC8295918; doi:10.1099/jgv.0.001609), 2021-05-27
Supplement: jgv-102-1609-s001.pdf [file jgv-102-1609-s001.pdf]

Supplementary Figure 1. The major immediate early locus (NC\_006273.2 nucleotides 170,568-176,978) is displayed with annotated exons, the transcription start site (TSS), and the CTCFBSDB2.0-predicted CTCF binding sites, using the nomenclature of the database to describe each site.

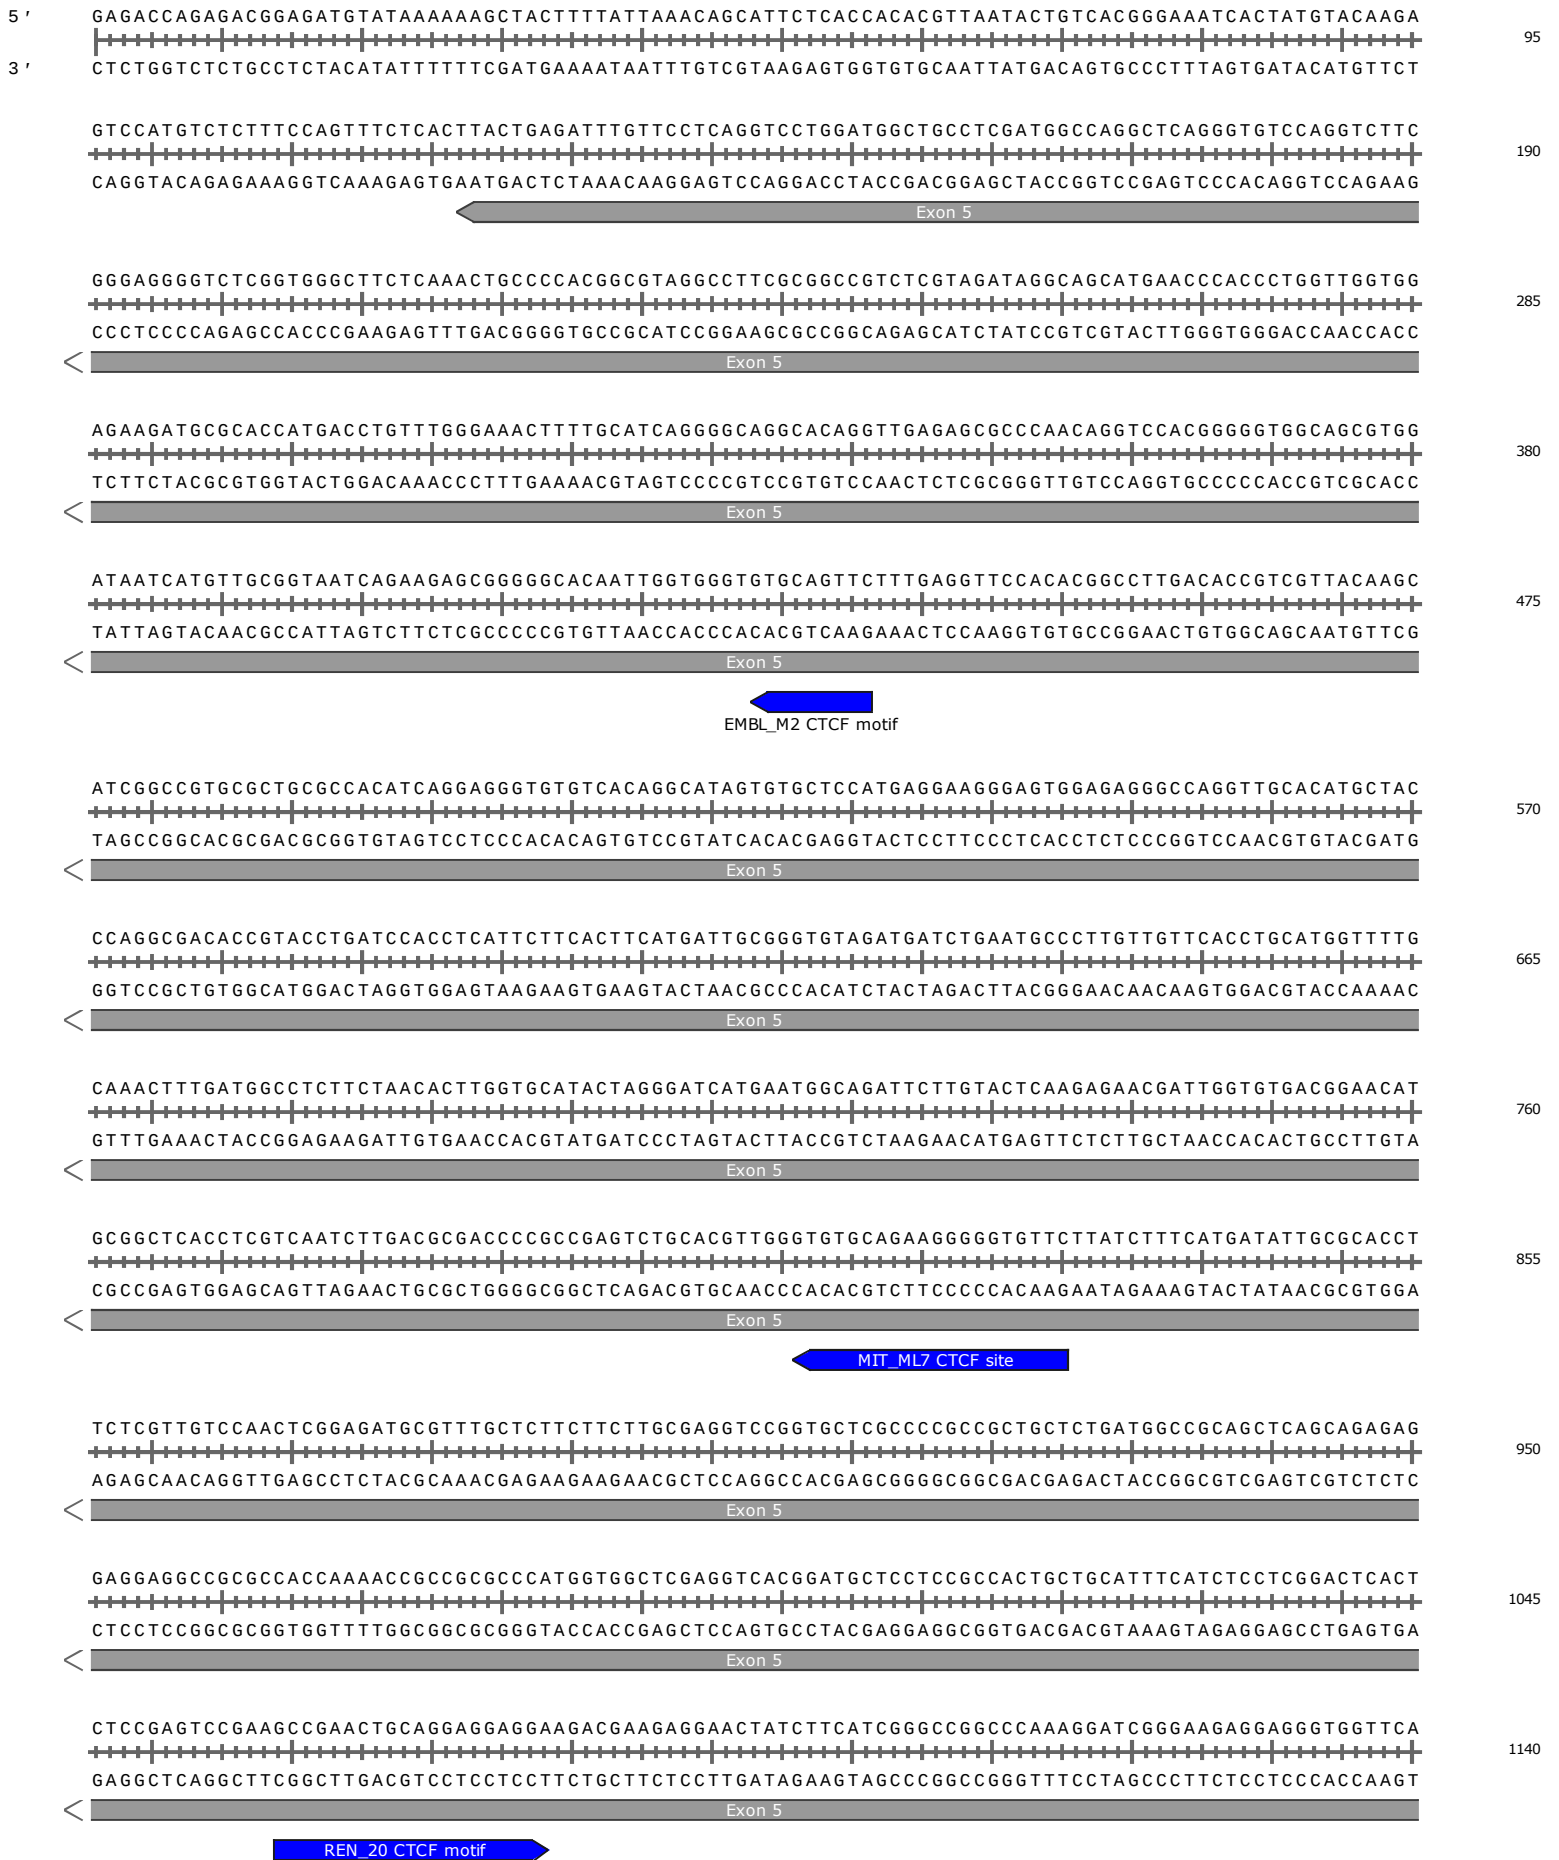

TCTGGGAGAGCGGGTGGTGGGAGAGGTCACCTCGCGGGTGCCTGCGCGTGGGAAAGGGGAAGACGCGGTAGCACCGGGTCTCGACTTCTCA  
AGACCCCTCTCGCCACGCACCCTCTCCAGTGAGCGCCGACGGCCACCTTCCCCTTCTGCGCCATCGTGCGGCCAGAGCTGAAGAAGT

1235

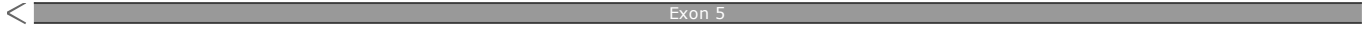

CCCTGTTCTTCTCGCTATCAGAGATCACGATACAGCCGGCGGTATCGATAATCTTGTGCGGTACTGGATGGTAAAGTCGGGCTCGGGCTTGT  
GGGACAAGAAGGAGCGATAGTCTCTAGTGCTATGTCGGCCGCATAGCTATTAGAACAACGCCATGACCTACCATTTCAGCCCGAGCCGAACCTA

1330

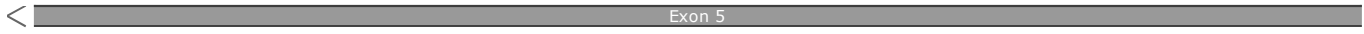

GTCTTCTGTTTGTAGAGGGGACAGCATGATAGCGCGGGAGGCACGGCGGTTAATAATCACCTTAAAAGGACGCGTGGTTTTGCGCGGTTTCT  
CAGAAGGACAACTACTCCCGTCTACTATCGCGCCCTCCGTGCCGCCAAATTATTAGTGAACCTTCTGCGCACAAAACGCGCCAAAGA

1425

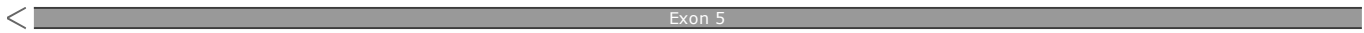

TACGCGGGCTGAGCTCGGGAGTAGCGGATGCCCGGGGAGAGGAGTGTAGTAACCGCGACGCTGGTGGGGTTCGGCTTGTAAAGAGGGGCGCTG  
ATGCGCCCGACTCGAGCCCTCATCGCCTACGGGGCCCTCTCCTCACAATCATTGGCGCTGCGACACCCCGAGCCGAACAATTCTCCCGCGAC

1520

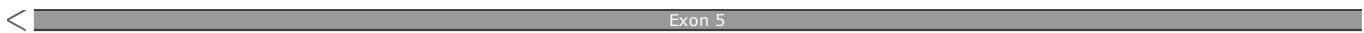

CTAACGCTGCAAGAGTGGGTTGTCAGCGTGGGGCCGGTGTACTGGAATCGATACCGGCATGATTGACAGCCTGGGCGAGGATGTCACCTGATGG  
GATTGCGACGTTCTACCCAACAGTCGCACCCCGGCCACGATGACCTTAGCTATGGCCGTAATACTGTGCGACCCGCTCTACAGTGGACTACC

1615

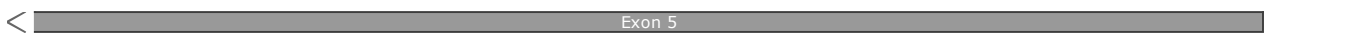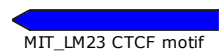

TGATAAGAAGACACGGGAGACTTAGTACGGTTTCACAGGCGTGACACGTTTATTGAGTAGGATTACAGAGTATAACATAGAGTATAATATAGAGT  
ACTATTCTTCTGTGCCCTCTGAATCATGCCAAAGTGTCCGCACTGTGCAAACTCATCCTAATGTCTCATATTGTATCTCATATTATATCTCA

1710

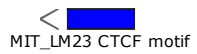

ATACAATAGTGACGTGGGATCCATAACAGTAACTGATATATACAATAGTTTACTGGTCAGCCTTGCTTCTAGTCACCATAGGGTGGGTGCTCT  
TATGTTATCACTGCACCCTAGGTATTGTCATTGACTATATATGTTATCAAAATGACCAGTCGGAACGAAGATCAGTGGTATCCACCCACGAGA

1805

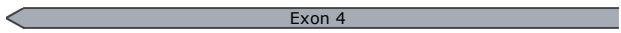

TGCCTCCAGAGGCGGTGGGTTCTCAGCACCATCCTCCTTCTCCTGAGGCAACTTCTCTATCTCAGACACTGGCTCAGACTTGACAGACACA  
ACGGAGGTCTCCGCCACCCAAGGAGTCTGGTAGGAGGAGAAGGAGACTCCGTTGAAGGAGATAGAGTCTGTGACCGAGTCTGAACTGTCTGTGT

1900

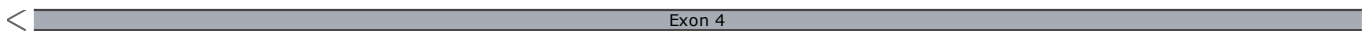

GTGTCCTCCCGCTCCTCCTGAGCACCTCCTCCTGTTCTCATCACTCTGTTCACTTTCTTCTGATCACTGTTCTCAGCCACAATTAAGTGGGA  
CACAGGAGGGCGAGGAGGACTCGTGGGAGGAGGACAAGGAGTAGTGAGACAAGTGAAGAAGGACTAGTGACAAGAGTGGGTGTTAATGACTCCT

1995

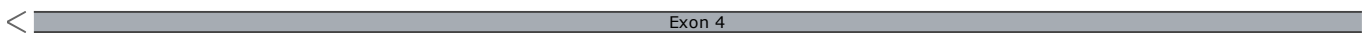

CAGAGGGATAGTCGCGGGTACAGGGGACTCTGGAGGTGACACCAGAGAATCAGAGGAGCTGGCACCGGGTGGCCAAAGTGTAGGCTACAATAG  
GTCTCCCTATCAGCGCCCATGTCCCTGAGACCTCCTGTTGTTCTTAGTCTCCTCGACCGTGGTCCGCCACCGGTTTACATCCGATGTTATC

2090

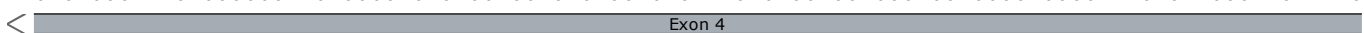

CCTTCTCCTCATCTGACTCCTCGCGATGGCCCGTAGGTCATCCACACTAGGAGAGCAGACTCTCAAAGGATCGGCCCCAGAATGTAAGTGGCA  
GGAGAAAGGAGTAGACTGAGGAGCCGCTACCGGCATCCAGTAGGTGTGATCCTCTCGTCTGAGAGTTTCTAGCCGGGGTCTTACATGACCCGT

2185

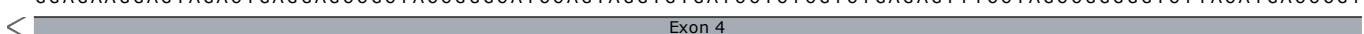

AAGACCTTCATGCAGATCTCCTCAATGCGGGCTTCATTACACTGATAACCTCAGGCTTGGTTATCAGAGGCGGCTTGGCCAGCATCACACTAGT  
TTCTGGAAGTACGTCTAGAGGAGTTACGCCGGAAGTAATGTGACTATTGGAGTCCGAACCAATAGTCTCCGGCGAACCGGTCGTAGTGTGATCA

2280

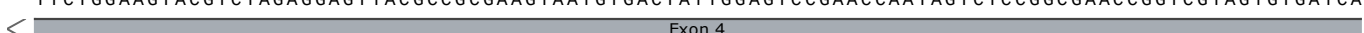

CTCCTTAAGACATAGCAGCACAGCACCCGACAGAACTCACTTAAGAGAGAGATGCCCCGTACATGGTCATCATAACAAGCGTCACTAGTGACCT  
GAGGAGATTCTGTATCGTCGTGCTGTTGGCTGTCTTGAGTGAATTCTCTCTACGGGGGCATGTACCAGTAGTATGTTTCGAGTGATCACTGGA

2375

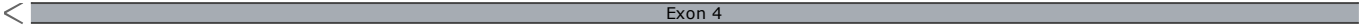

TGTA CT CATTACACATTGTTTCCACACATGTAGTGAGGATATCCATAAATATGTGATCAATGTGCGTGAGCACCTTGTCTCTCTCATCCAAA  
ACATGAGTAATGTGTAACAAAGGTGTGTACATCACTCCTATAGGTATTTATACACTAGTTACACGCACTCGTGAACAGAGAGAGGAGTAGGTTT

2470

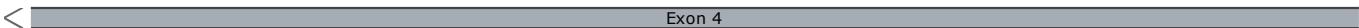

ATCTTAAAGATTTTCTGGGCATAAGACATAATCTCATCAGGAGAGCACTGAGGCAAGTTCTGCAATGCCGCCATGGCCTGACTGACGCCATTGGT  
TAGAATTTCTAAAAGACCCGTATTCTGTATTAGAGTAGTCTCTCGTGACTCCGTTCAAGACGTTACGGCGGTACGGACTGACGTCGGTAACCA

2565

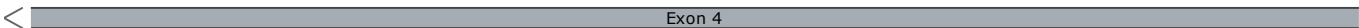

GGTCTTAGGGAAGGCTGAGTCTTGGTAAAGAACTCTATATTCCTGTAGCACATATACATCATCTTTCTCCTAAGTTCATCCTTTTTAGCACGGG  
CCAGAATCCCTCCGACTCAAGAACCATTCTTGAGATATAAGGACATCGTGTATATGTAGTAGAAAGAGGATTCAAGTAGGAAAAATCGTGCC

2660

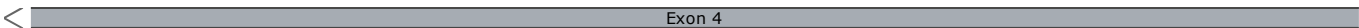

CCTTAGCCTGCAGTGCACCCCCAACTTGTAGCGGCGCCTTGCTCACATCATGCAGCTCCTTAATACAAGCCATCCACATCTCCGCTTATCC  
GGAATCGGACGTACGTGGGGGGTGAACAATCGCCGCGGGAACGAGTGTAGTACGTGAGGAATTATGTTTCGGTAGGTGTAGAGGGCGAATAGG

2755

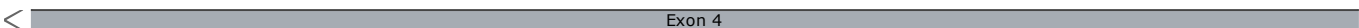

TCAGGTACAATGTAGTCTCATACATGCTCTGCATAGTTAGCCCAATACACTTCATGTCTCGAAAGGCTCATGAACCTTATCTAAGATATCTAA  
AGTCCATGTTACATCAAGAGTATGTACGAGACGTATCAATCGGGTATGTGAAGTACAGGAGCTTCCGAGTACTTGAATAGATTCTATAGATT

2850

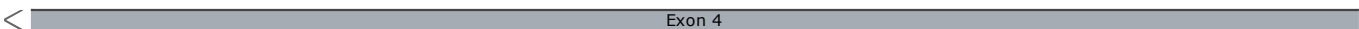

GGCATTCTGCAACATCCTCCCATCATATTAAGGCGCCAGTGAATTTTTCTTCGCTCGGGTATATTTTTTCAGCATGTGCTCCTTGATTCTAT  
CCGTAAAGACGTTGTAGGAGGGTAGTATAATTTCCGCGGTCACTTAAAAAGAAGGCAGACCCATATAAAAAAGTCGTACACGAGGAAC TAAGATA

2945

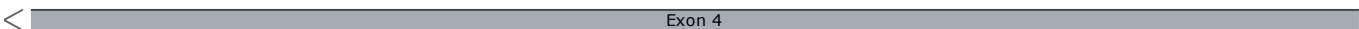

GCCGCACCATGTCCACTCGAACCTTAATCTGTTTACTGTAGAGGAGGATAACAACACATATAAGTATCCGTCTCCTGACTCATTATCGCTAT  
CGGCGTGGTACAGGTGAGCTTGAATTAGACAAACTGACATCTCCTCTATTGTTGTGTATATT CATAGGCAGGAGGACTGAGTAAATAGCGATA

3040

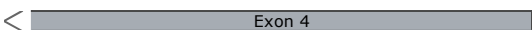

CTCGATGCCCGCTCACATGCAAGAGTTAATCTTCACTCTATCTGACATACACAAGTAAATCCACGTCCCATGCAGGTTAGTATATATCACATAC  
GAGCTACGGGGCGAGTGTACGTTCTCAATTAGAAGTGAGATAGACTGTATGTGTT CATT TAGGTGCAGGGTACGTCCAATCATATATAGTGTATG

3135

ATGTCAACAGACTTACCGAGTCTGTGACAGGACATCTTTTTCGGGTTCTCGTTGCAATCCTCGGTCACTTGTTCAAAGGTTTTGAGGGATTCTTC  
TACAGTTGCTGAATGGCTCAAGACAGTCTGTAGAAAAAGCCCCAAGAGCAACGTTAGGAGCCAGTGAACAAGTTTCCAAAACCTCCTAAGAAG

3230

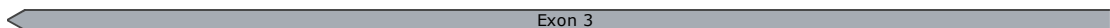

GGCCAACTCTGGGAACAGCGGGTCTCCAGGCTCAGCTGACTGTTAACCTCCTTCTTAACATAGTCTGCAGGAACGTCGTGGCCTTGGTCACGG  
CCGGTTAAGACCTTGTGCGCCAGAGGGTCCGAGTCACTGACAATTGGAGGAAGGAATTGTATCAGACGTCCTTGCAGCACCGGAACCAGTGCC

3325

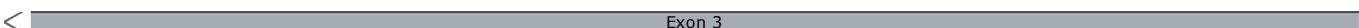

GTGTCTCGGGCCTAAACACATGATAAACAAGTCAAGCACATGGATCACATACAGGAAATATGTATATAACATTAAGATATAACTTTTTATT  
CACAGAGCCCGGATTTGTTACTATTTGTTTCAGTATTCTGTGACTAGTGTATGTCCTTTATACATATATTGTAATTTCTATATTGAAAAATAA

3420

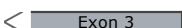

AAAAAAAGGGGAACAACAAGTCCCGACACGTACCGTGGCACCTTGGAGGAAGGGCCCTCGTCAGGATTATCAGGGTCCATCTTTCTCTTGGCAGAG  
TTTTTTTCCCTTGTGTTACAGGCTGTGCATGGCACCGTGAACCTCCTTCCGGGAGCAGTCTTAATAGTCCAGGTAGAAAGAGAACCCTCTC

3515

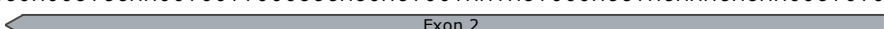

GACTCCATCGTGTCAAGGACGGTGACTGCAGAAAGGATCCATGGAAAGGAACAGTCTGTTAGTCTGTCTGAGCTATTATGTCTGGTGGCGCGCGGG  
CTGAGGTAGCACAGTTCTCTGCCACTGACGTCTTTCTAGGTACCTTTCTTGTCTGAGACAATCAGACAGTCTGATAATACAGACCACCGCGCGCGCC

3610

Exon 2

CAGCAACGAGTACTGCTCAGACTACACTGCCCTCCACCGTTAACAGCACCGCAACAGGAGTTACCTCTGACTCTCAACAGAACACAACCTCAGCTG  
GTCGTTGCTCATGACGAGTCTGATGTGACGGGAGGTGGCAATTGTCGTGGCGTTGTCTCAATGGAGACTGAGAGTTGCTTGTGTTGAGTCGAC

3705

MIT\_LM2 CTCF motif PUBLISHED

CCTGCTTCTTCTGCTGCTGCCTTAAGTCTTCCATCTGCGTCTGACGGTGAAGCCATTCCCGAGCTCATTTTCAGACACATACCCTACCGCCAC  
GGACGAAGAAGACGACGACGGAATTCAGAAGGTAGACGCGAGTCGCCACGTTCCGGTAAGGGGCTCGAGTAAAAGTCTGTGTATGGGATGGCGGTG

3800

GGCCTTGTGCGGCACACTGGTGGTGGTGGGCATCGTCTGTGCCTAAGTCTGGCCTCCACTGTTAGGAGCAAGGAGCTGCCGAGCGACCATGAGC  
CCGGAACACGCCGTGTGACCACCACCACCGTAGCACGACACGGATTAGACCGGAGGTGACAATCTCTGTTCTCGACGGCTCGCTGGTACTCG

3895

CGCTGGAGGCATGGGAGCAGGGCTCGGATGTGGAAGCTCCGCCGCTACCGGAGAAAGAGCCCATGTCCGGAACACGTACCCGAGATTCCGCTGGAG  
GCGACCTCCGTACCCTCGTCCCGAGCCTACACCTTCGAGGCGGCGATGGCCTCTTCTCGGGTACAGGCCCTTGTGCATGGGCTCTAAGCGCACCTC

3990

ATCCACGCTATGTTTAAATAAAAACACTGCGGGTACTGGGGACGGTGTGTTGTATATGTGAATTTGTAATAATAAATGGGACCCCATCCTGTAAA  
TAGGGTGCATACAAATTATTTTTGACGCCCATGACCCTGCCACAACAACATATACACTTAAACATTTATTATTTACCCTGGGGTAGGACATTT

4085

AATACAGAGTCCGTGTCAGTCTCTGAAGGACAGAGTATTGGCATATAGCCAATAAAGAGAGTTGTGGCAAAGAGCCATGTTATGGATTAGTAATG  
TTATGTCTCAGGCACAGTCAGAGACTTCTGTCTCATAACCGTATATCGGTTATTTCTCTCAACACCGTTTCTCGGTACAATACCTAATCATTAC

4180

GAAAGTATCGCCACCAATAGAGGAGTGGTCAATAATGGTCAATAACCCACACCTATAGGCTAAGCTATACCATCACCTATAGCATAAGGAAGCGG  
CTTTCATAGCGGTGGTTATCTCTCACCAGTTATTACCAGTTATTGGGTGTGGATATCCGATTGATATGGTAGTGGATATCGTATTCCTTCGCC

4275

GGGTGTATAGACCCCAAGCCAAAACAGTATAGCATGCATAAGAAGCCAAGGGGGTGGCCCTATAGAGTCTATAGGCGGTACTTACGCTCACTCTT  
CCCACATATCTGGGGTTCGGTTTTTGTCTATCTGACGATATTCTTCGGTTCCCCACCCGGATATCTCAGATATCCGCCATGAATGCAGTGAGAA

4370

Exon 1

GGCACGGGAATCCGCGTTCCAATGCACCGTTCCCGGCCGCGGAGGCTGGATCGGTCCCGGTGCTTCTATGGAGGTCAAACAGCGTGGATGGC  
CCGTGCCCTTAGGCGCAAGGTTACGTGGCAAGGGCCGGCGCTCCGACCTAGCCAGGGCCACAGAAGATACCTCCAGTTTTGTGCGACCTACCG

4465

Exon 1

GTCTCCAGGCGATCTGACGGTTCACTAAACGAGCTCTGCTTATATAGACCTCCCATAGTAAACGCCTACCGCCATTTGCGTCAATGGGGCGGAG  
CAGAGGTCCGCTAGACTGCCAAGTGATTTGCTCGAGACGAATATATCTGGAGGGTATCATTGCGGATGGCGGGTAAACGCAGTTACCCCGCCTC

4560

Exon 1

transcription start site

TTATTACGACATTTTGGAAAGTCCCGTTGAATTTGGTGCCAAAACAACTCCCATGACGTCATGAGGTTGGAGACTTGGAAATCCCGTGAGTC  
AATAATGCTGTAAACCTTTCAGGGCAACTTAAACCACGGTTTTGTTGAGGGTAACTGCAGTTACCCACCTCTGAACCTTATAGGGGCACTCAG

4655

AAACCGCTATCCACGCCATTGATGTACTGCCAAAACCGCATCACCATGGTAATAGCGATGACTAATACGTAGATGTACTGCCAAGTAGGAAAGT  
TTTGGCGATAGGTGCGGGTAACTACATGACGGTTTTGGCGTAGTGGTACCATTATCGCTACTGATTATGCATCTACATGACGGTTCATCCTTCA

4750

CCCCTAAGGTCATGTACTGGGCATAATGCCAGGCGGGCCATTTACCGTCATTGACGTCATAGGGGGCTACTTGGCATATGATACACTTGATGT  
GGGCATTCCAGTACATGACCCTATTACGGTCCGCCGGTAAATGGCAGTAACTGCAGTTATCCCGCATGAACCGTATACTATGTGAACACTACA

4845

EMBL\_M1 CTCF motif
